# Supplementary material for: Blast-Assisted Subsurface Characterisation Using a Novel Distributed Acoustic Sensing Setup Based on Geometric Phases
Source: MDPI journal article supplement (doi:10.3390/s24010030), 2023-12-20
Supplement: s1 [file s1]

**Blast-Assisted Subsurface Characterisation Using a Novel  
Distributed Acoustic Sensing Setup Based on Geometric Phases**

**SUPPLEMENTAL MATERIAL**

**A Python code to calculate geometric phase is provided. We also compute the traditionally measured dynamic phase for comparison at the end.**

**H5 file format is used to extract raw data and store processed data. CUDA multi-processing (using graphic card) is used for fast processing.**

**Models/part numbers of the hardware used in the setup are given at the end of this document.**

Sabahat Shaheen, Konstantin Hicke, Katerina Krebber

Bundesanstalt für Materialforschung und -Prüfung (BAM), Unter den  
Eichen 87, 12205 Berlin,  
Germany

sabahat.shaheen@bam.de

# Code created by Sabahat Shaheen

import h5py

import cupy as cp

import matplotlib

import matplotlib.pyplot as plt

from filtering import hilbert as hilbert\_transform

# filtering is an equivalent Python package used with cupy

# from scipy.signal import hilbert as hilbert\_transform (if not using cupy)

# input file with data. It consists of two data streams coming from the analog- to-digital Convertor (ADC) which converts the output of the two photodetectors to electrical domain. The output of the single photodetector,  $S_0'$  (in the text of the paper) is represented as So1. While the output from the balanced photodetector is So.

file\_name = '20230510\_1259.h5'

So2 = 60e-6 # intensity of local oscillator ( $S_0''$  in the paper)

# VARIABLES RELATED TO FIBER-UNDER-TEST

# Pulse width generated by the Signal Generator for modulating the output of Laser (50e-9 s for blast or 20e-9 s for traffic scenario)

PulseWidth = 50e-9

# Sampling Rate of the Analog-to-Digital Convertor (ADC), 500 MSa/s at which photodetector outputs are sampled.

SampRate = 500000000

# Pulse Repetition Frequency provided by Signal Generator (500 Hz for blast or 1000 Hz for traffic)

SigFreq = 500

# Samples per Cycle are the samples recorded by the ADC, 2\*\*16 for blast (10 km) and 2 \*\* 13 (1 km) for traffic (Samples per Cycle depend on fibre length assumed).

SamPerCyc = 2\*\*16

# Spatial Resolution of the setup in [Samples/meter], calculated as:

$$\text{Spatial Resolution} = \frac{\text{Sampling Rate [samples/second]}}{\text{Speed of light in fiber/2 [meter/second]}}$$

SpatialRes = cp.ceil(SampRate/1e8)

# fiber distance vector

dist = cp.linspace(0, 1e8\*(SamPerCyc/SampRate), SamPerCyc, endpoint=True)

# Gauge Length [m] = Pulse width [s] \*  $\frac{\text{Speed of light in fiber } (2e-8) \text{ [m/s]}}{2}$

G = PulseWidth\*1e8

# Number of samples included in one Gauge Length, G

g = int(SpatialRes\*G)

# VARIABLES FOR CALCULATION OF GEOMETRIC PHASE

# N is the number of sections into which a beat period is divided. We consider two beat periods to get an integer value.

# N = 9 for AOM with 110 MHz frequency offset and sampling rate of 500 MSa/s

N = 9

n = np.arange(1, N)

factor = np.cos((2\*np.pi\*n)/N) # Constant term in Eq. 1 (used later)

# The data is processed in loops where each loop will process a block of data with 2\*\*24 samples.

block = 2\*\*24

# total samples in the entire data

with h5py.File(file\_name, 'r') as f:

totSamples = len(f["data"])

# number of loops required for the entire data

nloops = totSamples//block

# no. of pulses (traces or time-series of strain) in each processing block

nPulses = block//SamPerCyc

# time vector for a given loop

time = np.linspace(0, (1/SigFreq)\*nPulses//2, nPulses//2, endpoint=True)

offset = 0 # variable used to offset the data in every loop

```

# factors to convert from photo-detector signals to Volts
cfac1 = ((2.500/8191)/(1*1.4e3*10)) # single photo-detector
cfac2 = (2.500/8191)/(1*15e3)      # balanced photodetector

# Create .h5 files to write processed data. We calculate both the
dynamic phase and geometric phase and corresponding strain.

with h5py.File('processed.h5', 'w') as p:

    p.create_dataset("geo_strain", (0, SamPerCyc-g),
chunks=(nPulses//2, SamPerCyc-g), maxshape=(None, SamPerCyc-g))

    p.create_dataset("dyn_strain", (0, SamPerCyc-g),
chunks=(nPulses//2, SamPerCyc-g), maxshape=(None, SamPerCyc-g))

# Start the loop, where strain values for a block of data is calculated
per loop from dynamic and geometric phase.

while(nloops>0):

    with h5py.File(file_name, 'r') as f:

# Read raw data (output of single photodetector, So1 and output of
balanced photodetector, So2).

        data = cp.asarray(cp.asarray(f['data'][offset:offset+block]))

        So = data[0::2]*cfac2

        So1 = data[1::2]*cfac1

# With reference to Eq. 2:

# The two beam intensities are multiplied, and their square root is
taken. Beat signal's amplitude is then normalised with it.

        arr = cp.sqrt(cp.abs(So1)*So2)

# However, to avoid divide by zero, the values where So1 is zero are
replaced by the first value in the time-series.

        arr[arr==0] = arr[0]

```

# Beat signal's amplitude is then normalised with it.

```
gamma_0 = cp.abs(hilbert_transform(So/arr, axis = -1))
```

# With reference to Eq. 1, individual terms are calculated:

```
term1 = So1*cp.exp((-1j*cp.pi)/N)
```

```
term2 = So2*cp.exp((1j*cp.pi)/N)
```

```
term3 = 2*arr*gamma_0
```

# The third term require convolution with factor =  $\text{cp.cos}((2*\text{cp.pi}*n)/N)$ . First term is also convolved with ones so that the two can be added.

```
term1_conv = cp.convolve(term1, cp.ones((N-1)), 'valid')
```

```
term3_conv = cp.convolve(term3, factor, 'valid')
```

# Geometric phase is calculated by adding all the terms as per Eq. 1

```
phi_PB = cp.pi - cp.angle(term1_conv + term2 + term3_conv)
```

# A few missing samples at the end are replaced by zeros

```
phi_PB = cp.append(phi_PB, cp.zeros((1, N-2)))
```

# Geometric phase vector is reshaped into distance-time frame.

```
phi_PB = cp.reshape(phi_PB, (nPulses//2, SamPerCyc))
```

# Differential phase is calculated, which is proportional to strain.

```
dphi_PB = phi_PB[:, g:] - phi_PB[:, :-g]
```

# Geometric phase in  $n\epsilon$  is finally calculated.

```
strain_PB = ((1550.12e-9)*dphi_PB/(4*cp.pi*1.4682*G*0.78))*1e9*g
```

# The .h5 files are re-sized and the block of geometric phase calculated in this loop is saved in it.

```
p["geo_strain"].resize((p["geo_strain"].shape[0] + strain_PB.shape[0]), axis = 0)
```

```
p["geo_strain"][-strain_PB.shape[0]:] = cp.asnumpy(strain_PB)
```

```
# CALCULATION OF DYNAMIC PHASE
```

```
# To compare our results, dynamic phase is also calculated using the  
method given in state-of-the-art.
```

```
# To calculate dynamic phase, we extract phase from the Hilbert  
transform of the beat signal.
```

```
    phase = cp.angle(hilbert_transform(So, axis = -1))
```

```
# Dynamic phase vector is reshaped into distance-time frame.
```

```
    phase = cp.reshape(phase, (nPulses//2, SamPerCyc))
```

```
# Differential phase is calculated, which is proportional to strain.
```

```
    dphase = phase[:,g:] - phase[:,:-g]
```

```
# Dynamic phase in  $\epsilon$  is finally calculated.
```

```
    strain_CH = ((1550.12e-  
9)*dphase/(4*cp.pi*1.4682*G*0.78))*1e9
```

```
    # The .h5 files are re-sized and the block of dynamic phase  
calculated in this loop is saved in it.
```

```
    p["dyn_strain"].resize((p["dyn_strain"].shape[0] +  
strain_CH.shape[0]), axis = 0)
```

```
    p["dyn_strain"][-strain_CH.shape[0]:] = cp.asnumpy(strain_CH)
```

```
# the loop number is decremented till we reach a value of zero.
```

```
    nloops = nloops - 1
```

```
# variable offset is advanced by the block of samples = 2**24
```

```
    offset = offset + block
```

```
# loop number is printed on screen
```

```
    print("strain ... ", nloops)
```

```
# ..... END OF CODE .....
```

### Models of the hardware used in the setup:

LASER: Orion RIO ORION Laser Module

- Phase Noise: Grade 3
- Linewidth:  $\leq 5$  kHz (Lorentzian)

OPTICAL SWITCH: Polarization-Dependent Optical Switch  
(BOA 100 4PXS)

Driver: PicoLAS short pulse driver (BFS-VRM 03 HP / LP)

- Rise/fall time 1 ns
- 

ACOUSTO-OPTIC MODULATOR

T-M110-0.2C2J-3-F2S with driver (2910 series)

- Frequency offset: 110 MHz

EDFA (Pulsed, used before transmitting pulses into the FUT):

C-band pulsed EDFA by Beogold

-Pulsed output for high SNR

EDFA (used at the receiver)

MAFA 5000 series by emcore (now discontinued)

ADC: M4i.44xx-x8 - 14/16 bit Digitizer up to 500 MS/s by Spectrum Instruments

Single Photo-detector (TTI 525, now discontinued)

Balanced Photodetector: Thorlabs PDB4x5
